# Supplementary material for: The tongue biofilm metatranscriptome identifies metabolic pathways associated with the presence or absence of halitosis
Source: Springer Nature journal article supplement (doi:10.1038/s41522-022-00364-2), 2022-12-19
Supplement: MOESM1 [file 41522_2022_364_MOESM1_ESM.pdf]

**Supplementary Figure 1. Bacterial and functional diversity in tongue biofilms from halitosis and halitosis-free individuals.** Diversity (Shannon) and richness (Chao1) indexes were calculated using both the number of bacterial species (A) and genes (B) detected in the metatranscriptomes, obtained by Nextseq Illumina RNAseq. Rarefaction curves (C) were calculated for the same number of reads in each sample ( $5 \times 10^4$ ), annotated to a bacterial species (left) or a gene (right). Differences were calculated using Wilcoxon test.

**Supplementary Figure 2. Functional differences between halitosis groups.** The graph shows the results of a Canonical Correspondence Analysis (CCA) based on microbial gene expression in the different groups studied (*Ctr*, *MM*, *HS* and *MM-HS*). An ADONIS test was used.

**A**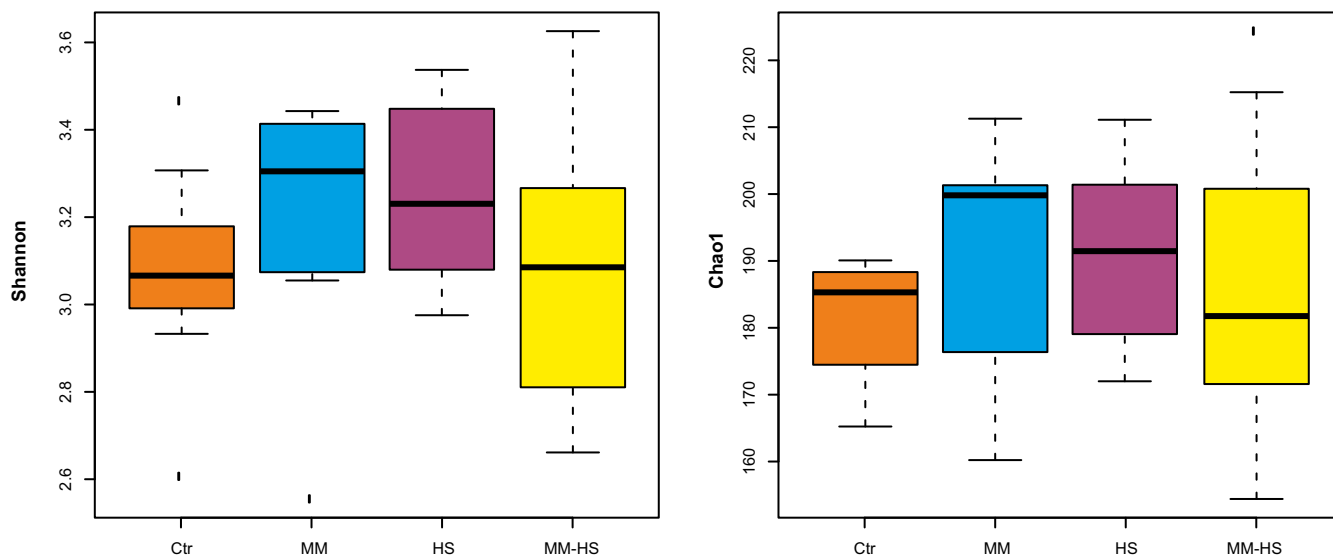**B**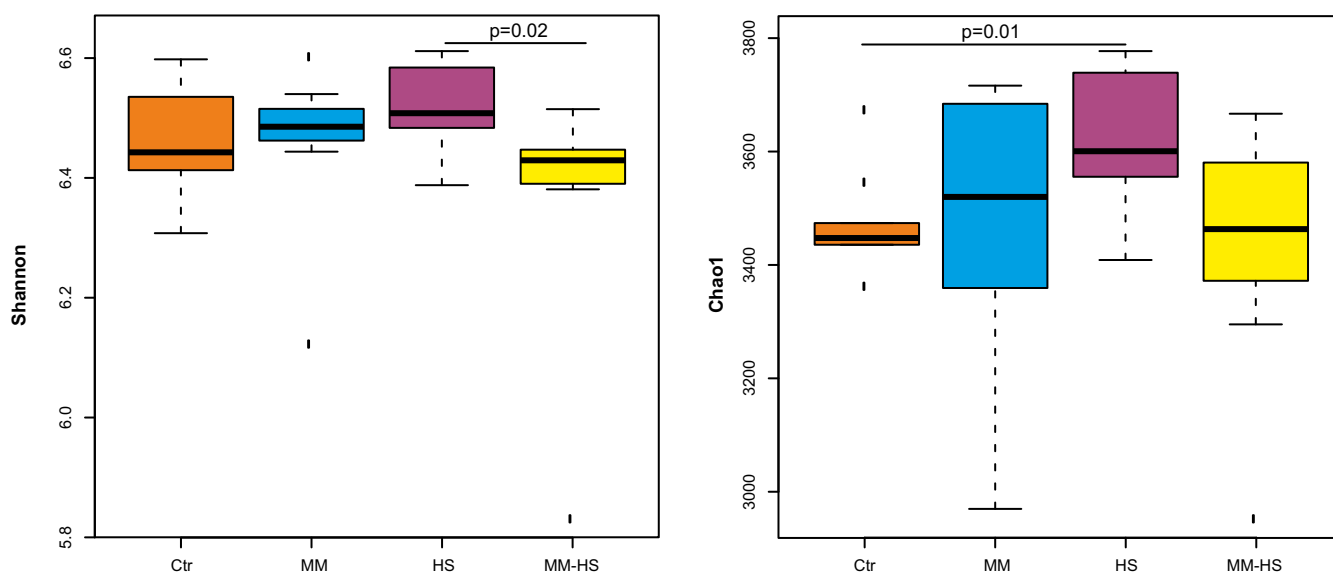**C**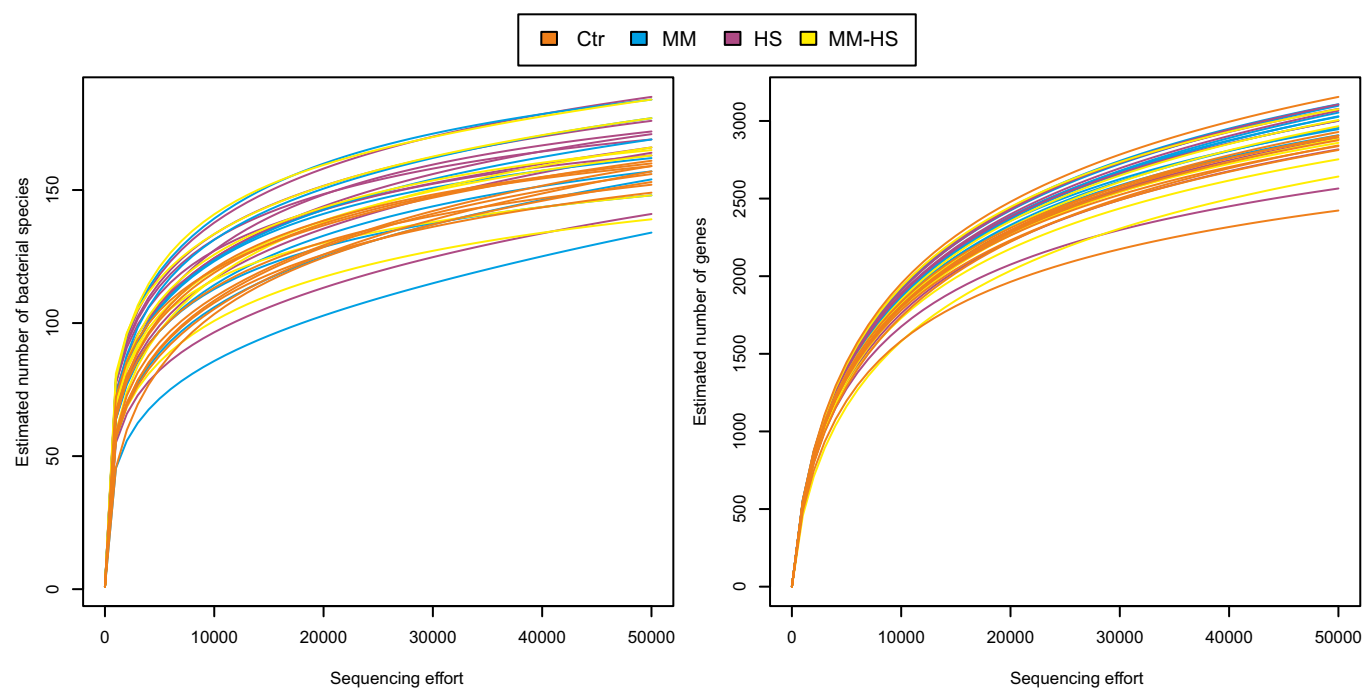

CCA p-value:0.001 - ADONIS p-value: 0.27

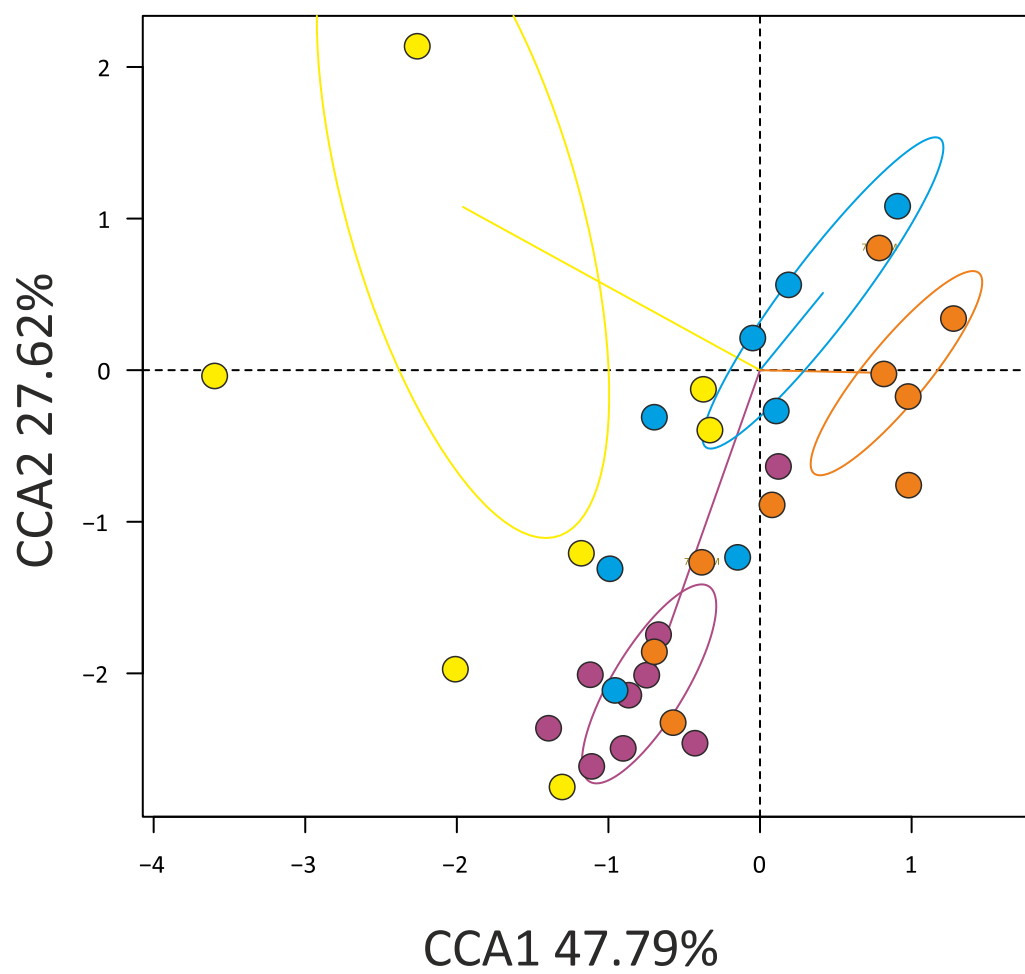

● Ctr ● MM ● HS ● MM-HS
